# Supplementary material for: O-MoS2/Mn0.5Cd0.5S composites with enhanced activity for visible-light-driven photocatalytic hydrogen evolution
Source: Royal Society of Chemistry journal article supplement (doi:10.1039/d0cy00750a), 2020-01-01
Supplement: d0cy00750a1.pdf [file d0cy00750a1.pdf]

## **O-MoS<sub>2</sub>/Mn<sub>0.5</sub>Cd<sub>0.5</sub>S composites with enhanced activity for visible-light-driven photocatalytic hydrogen evolution**

Xuanxuan Yang, Yu Guo, Yongbing Lou\*, Jinxi Chen\*

*School of Chemistry and Chemical Engineering, Jiangsu Engineering Laboratory of Smart Carbon-Rich Materials and Device, Southeast University, Nanjing 211189, PR China*

*\*Corresponding author.*

*\*E-mail address: chenjinxi@seu.edu.cn (J. Chen); lou@seu.edu.cn (Y. Lou);*

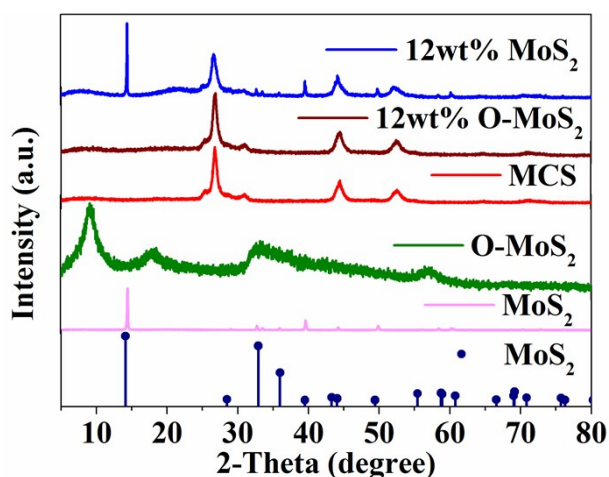

Fig. S1. XRD patterns of MoS<sub>2</sub>, O-MoS<sub>2</sub> and their composites.

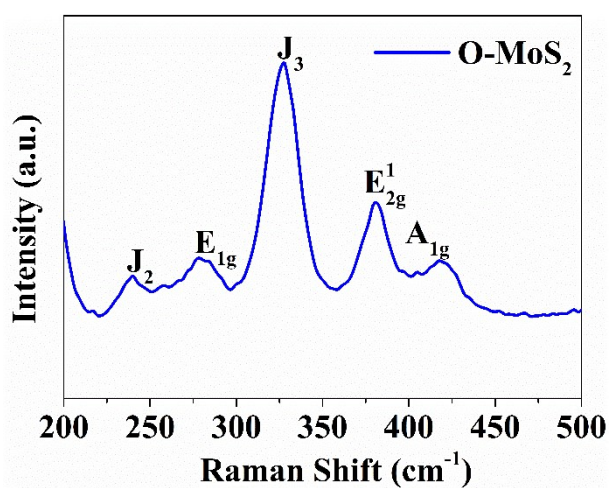

Fig. S2. Raman spectrum of O-MoS<sub>2</sub>.

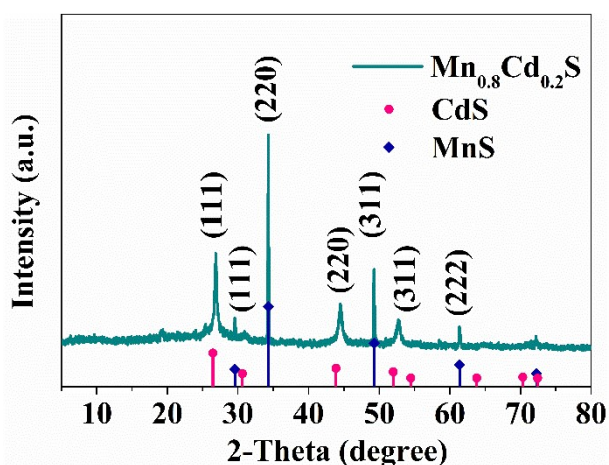

Fig. S3. XRD pattern of Mn<sub>0.8</sub>Cd<sub>0.2</sub>S nanoparticles.

To further elucidate the phase structure of Mn<sub>0.5</sub>Cd<sub>0.5</sub>S, Mn<sub>0.8</sub>Cd<sub>0.2</sub>S nanoparticles with a similar crystal phase are synthesized in the same condition (just increase the ratio

of Mn and Cd elements) and the crystallinity of them are investigated with XRD. As demonstrated, three sharp and noticeable diffraction peaks of all samples at  $26.9^\circ$ ,  $31.0^\circ$ ,  $44.5^\circ$  and  $52.7^\circ$  are assigned respectively to the (111), (200), (220) and (311) planes of cubic phase CdS (JCPDS No. 89-440), which is similar to that of  $\text{Mn}_{0.5}\text{Cd}_{0.5}\text{S}$ . Apart from that, the sample of  $\text{Mn}_{0.8}\text{Cd}_{0.2}\text{S}$  displays four new features at about  $29.6^\circ$ ,  $34.3^\circ$ ,  $49.3^\circ$  and  $61.3^\circ$  (Fig.S3), which are separately matched with the (111), (220), (311) and (222) reflections of cubic  $\alpha$ -MnS (JCPDS No. 89-4952). The result indicates that as-prepared  $\text{Mn}_{0.5}\text{Cd}_{0.5}\text{S}$  solid solution is cubic phase.

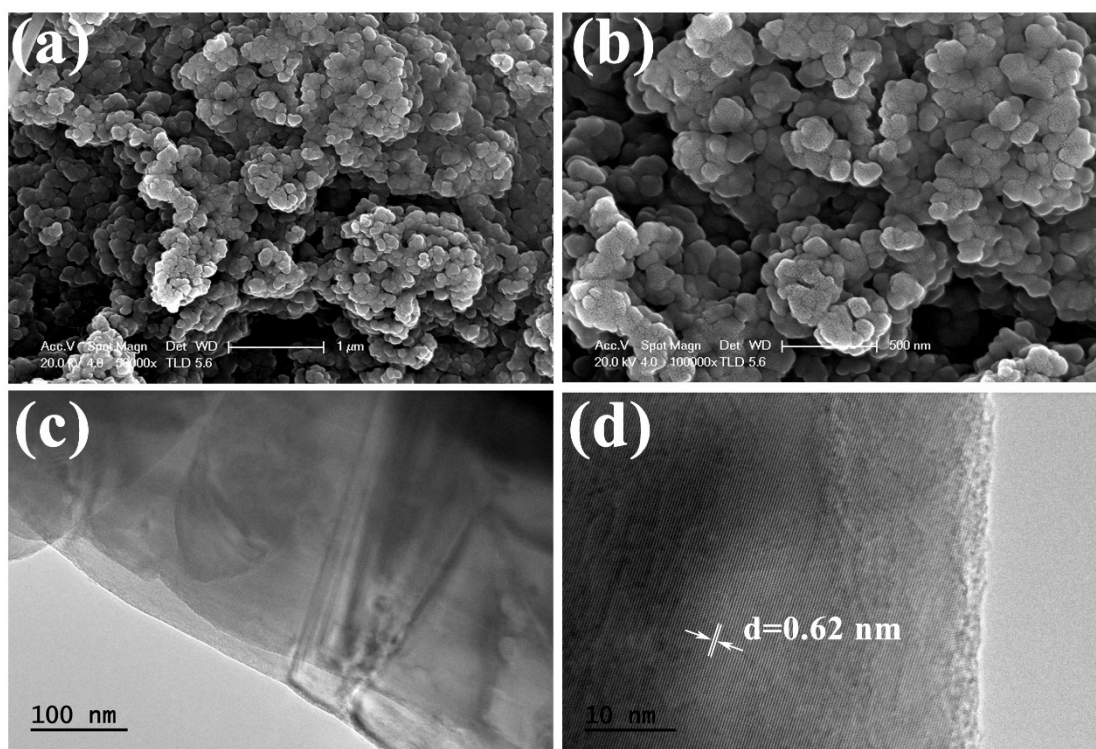

**Fig. S4.** SEM (a)(b) and TEM (c)(d) of MoS<sub>2</sub>.

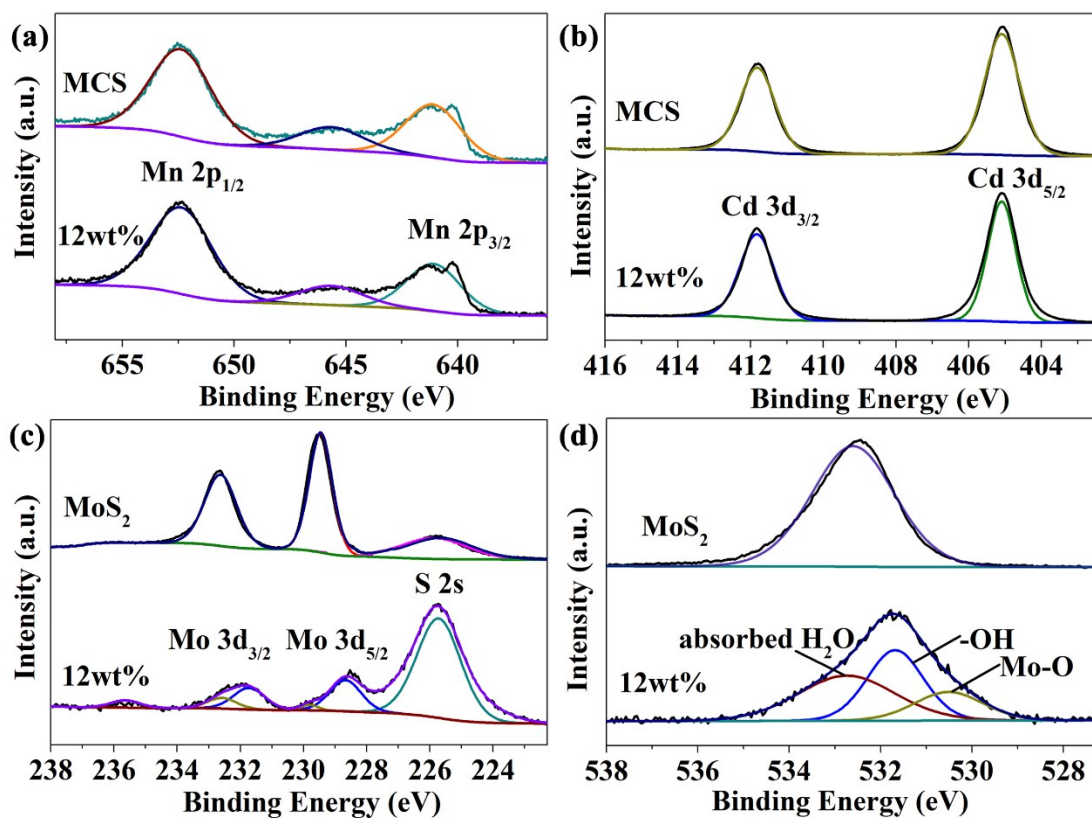

Fig. S5. XPS comparisons of Mn<sub>0.5</sub>Cd<sub>0.5</sub>S, MoS<sub>2</sub> and 12wt% O-MoS<sub>2</sub>/Mn<sub>0.5</sub>Cd<sub>0.5</sub>S.

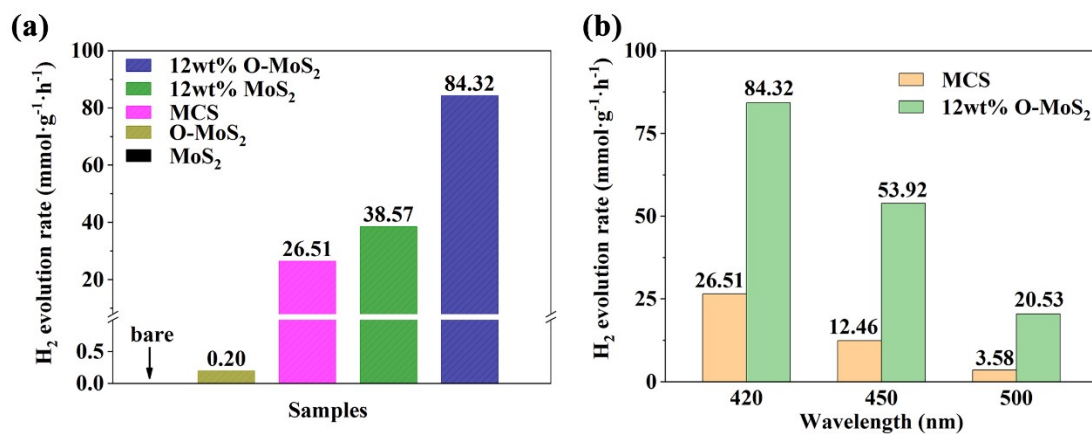

Fig. S6. Photocatalytic hydrogen evolution rates of composites (a) at 420 nm and (b) at different wavelengths.

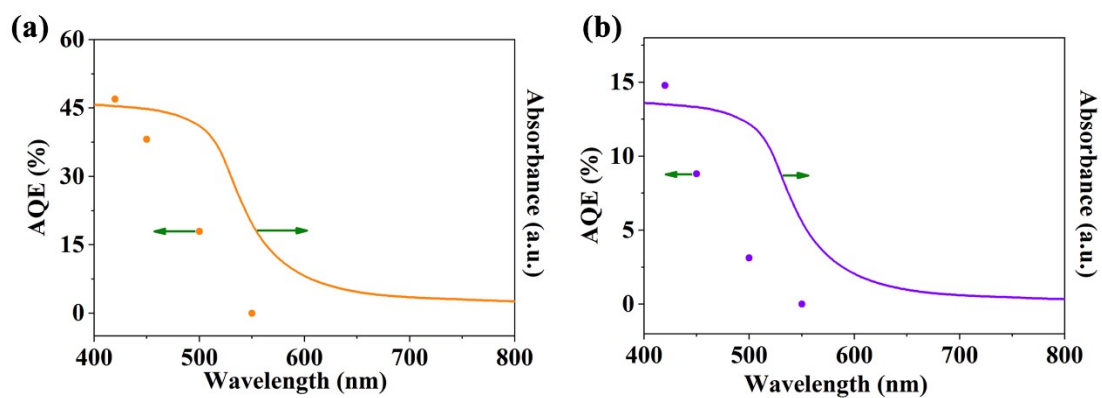

**Fig. S7.** The wavelength-dependent AQE of 12wt% O-MoS<sub>2</sub>/Mn<sub>0.5</sub>Cd<sub>0.5</sub>S and pristine Mn<sub>0.5</sub>Cd<sub>0.5</sub>S for hydrogen evolution.

**Table S1.** The AQE values of Mn<sub>0.5</sub>Cd<sub>0.5</sub>S and 12wt% O-MoS<sub>2</sub>/Mn<sub>0.5</sub>Cd<sub>0.5</sub>S at different wavelengths.

| Sample                                | Wavelength (nm)                                                   | 420   | 450   | 500   | 550 |
|---------------------------------------|-------------------------------------------------------------------|-------|-------|-------|-----|
| 12wt%                                 | Evolved H <sub>2</sub><br>(mmol g <sup>-1</sup> h <sup>-1</sup> ) | 84.32 | 53.92 | 20.53 | 0   |
|                                       | AQE (%)                                                           | 46.92 | 38.14 | 17.94 | 0   |
| Mn <sub>0.5</sub> Cd <sub>0.5</sub> S | Evolved H <sub>2</sub><br>(mmol g <sup>-1</sup> h <sup>-1</sup> ) | 26.51 | 12.46 | 3.58  | 0   |
|                                       | AQE (%)                                                           | 14.79 | 8.81  | 3.13  | 0   |

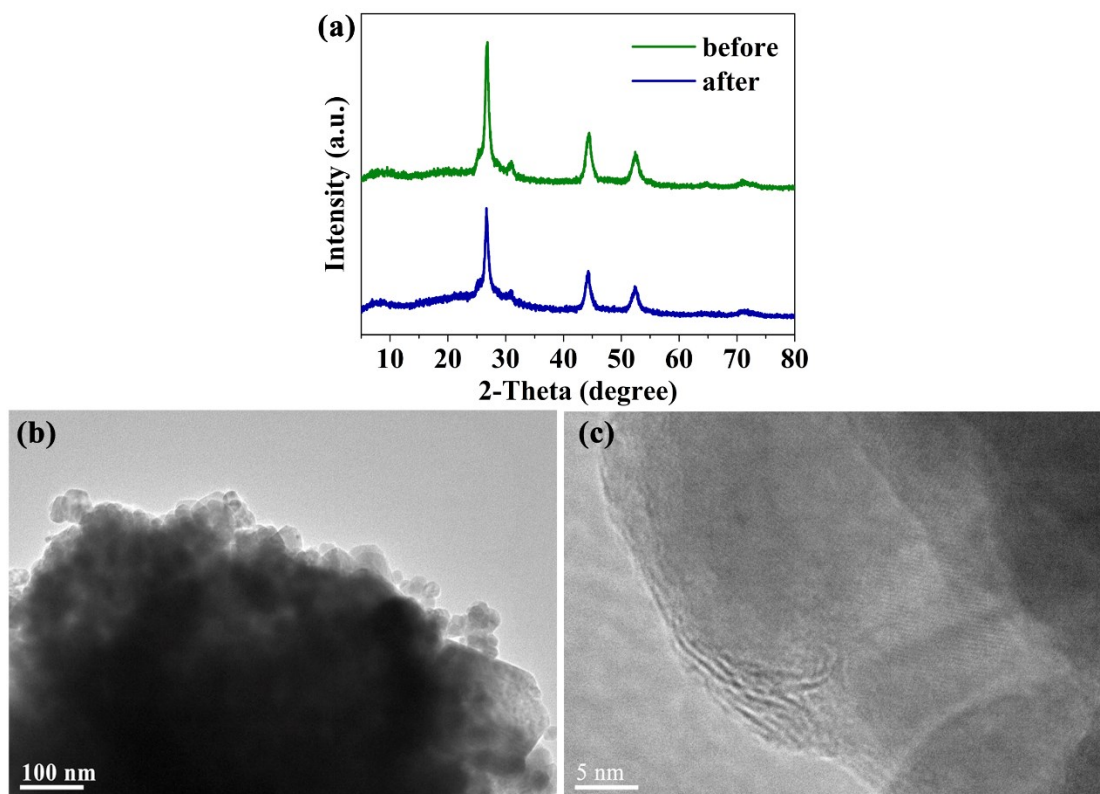

**Fig. S8.** (a) XRD patterns of 12wt% O-MoS<sub>2</sub>/Mn<sub>0.5</sub>Cd<sub>0.5</sub>S after reaction for 16 h under visible light irradiation (b) TEM and (c) HRTEM image of 12wt% O-MoS<sub>2</sub>/Mn<sub>0.5</sub>Cd<sub>0.5</sub>S after reaction for 16 h under visible light irradiation.

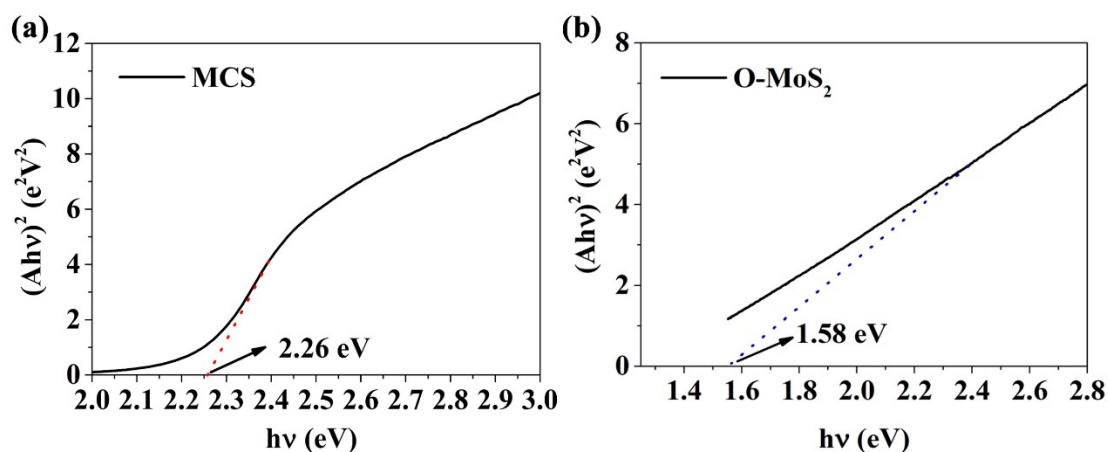

**Fig. S9.** (a) calculated bandgap of Mn<sub>0.5</sub>Cd<sub>0.5</sub>S and (b) O-MoS<sub>2</sub>.

**Table S2.** The data obtained from of time-resolved PL decay spectra fitted curves of

Mn<sub>0.5</sub>Cd<sub>0.5</sub>S and 12wt% O-MoS<sub>2</sub>/Mn<sub>0.5</sub>Cd<sub>0.5</sub>S.

| Sample                                | T <sub>1</sub> (ns) | T <sub>2</sub> (ns) | T <sub>3</sub> (ns) | A <sub>1</sub> (%) | A <sub>2</sub> (%) | A <sub>3</sub> (%) | Avlifetime (ns) |
|---------------------------------------|---------------------|---------------------|---------------------|--------------------|--------------------|--------------------|-----------------|
| Mn <sub>0.5</sub> Cd <sub>0.5</sub> S | 0.93                | 3.48                | 17.59               | 29.16              | 53.11              | 17.73              | 5.24            |
| 12wt%                                 | 1.13                | 5.43                | 18.65               | 32.52              | 54.36              | 13.12              | 5.77            |

**Table S3.** Comparison on the hydrogen evolution rates of other Mn-Cd-S-based composites.

| Photocatalyst                                                               | Sacrificial agents                                | Light source | Maximum rate (mmol g <sup>-1</sup> h <sup>-1</sup> ) | Reference |
|-----------------------------------------------------------------------------|---------------------------------------------------|--------------|------------------------------------------------------|-----------|
| O-MoS <sub>2</sub> /Mn <sub>0.5</sub> Cd <sub>0.5</sub> S                   | Na <sub>2</sub> S/Na <sub>2</sub> SO <sub>3</sub> | λ ≥ 420nm    | 84.32                                                | This work |
| Mn <sub>0.8</sub> Cd <sub>0.2</sub> S                                       | Na <sub>2</sub> S/Na <sub>2</sub> SO <sub>3</sub> | λ > 420nm    | 3.56                                                 | 1         |
| Mn <sub>0.5</sub> Cd <sub>0.5</sub> S                                       | Na <sub>2</sub> S/Na <sub>2</sub> SO <sub>3</sub> | λ > 400nm    | 26.00                                                | 2         |
| Pt/Mn <sub>0.6</sub> Cd <sub>0.4</sub> S                                    | Lactic acid                                       | λ > 420nm    | 2.25                                                 | 3         |
| MoS <sub>2</sub> /Mn <sub>0.25</sub> Cd <sub>0.75</sub> S                   | Na <sub>2</sub> S/Na <sub>2</sub> SO <sub>3</sub> | λ > 400nm    | 12.47                                                | 4         |
| MoS <sub>2</sub> /Mn <sub>0.5</sub> Cd <sub>0.5</sub> S                     | Na <sub>2</sub> S/Na <sub>2</sub> SO <sub>3</sub> | λ ≥ 420nm    | 9.82                                                 | 5         |
| MoS <sub>2</sub> /Mn <sub>0.8</sub> Cd <sub>0.2</sub> S/MnS                 | Na <sub>2</sub> S/Na <sub>2</sub> SO <sub>3</sub> | λ ≥ 420nm    | 19.90                                                | 6         |
| MoS <sub>2</sub> /Mn <sub>0.5</sub> Cd <sub>0.5</sub> S/Cu <sub>2-x</sub> S | Na <sub>2</sub> S/Na <sub>2</sub> SO <sub>3</sub> | λ ≥ 420nm    | 13.75                                                | 7         |
| MoS <sub>2</sub> /Mn <sub>0.5</sub> Cd <sub>0.5</sub> S/RGO                 | Na <sub>2</sub> S/Na <sub>2</sub> SO <sub>3</sub> | Solar light  | 12.84                                                | 8         |
| CuS/Mn <sub>0.5</sub> Cd <sub>0.5</sub> S                                   | Na <sub>2</sub> S/Na <sub>2</sub> SO <sub>3</sub> | λ ≥ 420nm    | 106.84                                               | 9         |
| CoS <sub>x</sub> /Mn <sub>0.5</sub> Cd <sub>0.5</sub> S                     | Na <sub>2</sub> S/Na <sub>2</sub> SO <sub>3</sub> | λ > 420nm    | 8.60                                                 | 10        |
| CoP <sub>3</sub> /Mn <sub>0.8</sub> Cd <sub>0.2</sub> S                     | Na <sub>2</sub> S/Na <sub>2</sub> SO <sub>3</sub> | λ ≥ 420nm    | 29.53                                                | 11        |
| CoP/Mn <sub>0.5</sub> Cd <sub>0.5</sub> S                                   | Na <sub>2</sub> S/Na <sub>2</sub> SO <sub>3</sub> | λ ≥ 420nm    | 65.32                                                | 12        |
| NiS/Mn <sub>0.5</sub> Cd <sub>0.5</sub> S                                   | Na <sub>2</sub> S/Na <sub>2</sub> SO <sub>3</sub> | λ ≥ 420nm    | 8.39                                                 | 13        |
| g-C <sub>3</sub> N <sub>4</sub> /Mn <sub>0.8</sub> Cd <sub>0.2</sub> S      | Na <sub>2</sub> S/Na <sub>2</sub> SO <sub>3</sub> | λ > 420nm    | 4.00                                                 | 14        |

## References

- 1 H. Liu, J. Meng and J. Zhang, *Catal. Sci. Technol.*, 2017, **7**, 3802-3811.
- 2 L. Li, G. Liu, S. Qi, X. Liu, L. Gu, Y. Lou, J. Chen and Y. Zhao, *J. Mater. Chem. A*, 2018, **6**, 23683-23689.
- 3 H. Li, Z. Wang, Y. He, S. Meng, Y. Xu, S. Chen and X. Fu, *J. Colloid Interface Sci.*, 2019, **535**, 469-480.
- 4 Q. Huang, Y. Xiong, Q. Zhang, H. Yao and Z. Li, *Appl. Catal., B*, 2017, **209**, 514-522.
- 5 P. Zeng, J. Luo, J. Wang and T. Peng, *Catal. Sci. Technol.*, 2019, **9**, 762-771.

- 6 J. Wang, J. Luo, D. Liu, S. Chen and T. Peng, *Appl. Catal., B*, 2019, **241**, 130-140.
- 7 X. Liu, Q. Liu, P. Wang, Y. Liu, B. Huang, E. A. Rozhkova, Q. Zhang, Z. Wang, Y. Dai and J. Lu, *Chem. Eng. J.*, 2018, **337**, 480-487.
- 8 Y. Liu, Z. Gong, Y. Xie, H. Lv and B. Zhang, *Appl. Surf. Sci.*, 2020, **505**, 144637.
- 9 Y. Han, X. Dong and Z. Liang, *Catal. Sci. Technol.*, 2019, **9**, 1427-1436.
- 10 M. Wang, Q. Liu, N. Xu, N. Su, X. Wang and W. Su, *Catal. Sci. Technol.*, 2018, **8**, 4122-4128.
- 11 Q. Huang, Z. Tao, L. Ye, H. Yao and Z. Li, *Appl. Catal., B*, 2018, **237**, 689-698.
- 12 R. Chen, Y. Ao, C. Wang and P. Wang, *Dalton Trans.*, 2019, **48**, 14783-14791.
- 13 X. Liu, X. Liang, P. Wang, B. Huang, X. Qin, X. Zhang and Y. Dai, *Appl. Catal., B*, 2017, **203**, 282-288.
- 14 H. Liu, Z. Xu, Z. Zhang and D. Ao, *Appl. Catal. A: Gen.*, 2016, **518**, 150-157.
